# Supplementary material for: Histotripsy Ablation Alters the Tumor Microenvironment and Promotes Immune System Activation in a Subcutaneous Model of Pancreatic Cancer
Source: PubMed Central journal article supplement (PMC9295194; doi:10.1109/tuffc.2021.3078094), 2021-08-27

# Supplemental Table 1

| Symbol | Unigene   | Refseq       | Fold Regulation |         |           |         | Symbol   | Unigene   | Refseq       | Fold Regulation |         |           |         |
|--------|-----------|--------------|-----------------|---------|-----------|---------|----------|-----------|--------------|-----------------|---------|-----------|---------|
|        |           |              | 24 Hours        |         | Survival  |         |          |           |              | 24 Hours        |         | Survival  |         |
|        |           |              | Untreated       | Treated | Untreated | Treated |          |           |              | Untreated       | Treated | Untreated | Treated |
| Ackr3  | Mm.6522   | NM_007722    | 1.00            | 1.11    | 1.00      | 1.00    | Ifng     | Mm.240327 | NM_008337    | 1.00            | 1.11    | 1.00      | 1.10    |
| Aicda  | Mm.391503 | NM_009645    | 1.00            | 1.15    | 1.00      | -4.44   | Igf1     | Mm.268521 | NM_010512    | 1.00            | -1.95   | 1.00      | -1.97   |
| Bcl2   | Mm.257460 | NM_009741    | 1.00            | -1.01   | 1.00      | -2.06   | Il10     | Mm.874    | NM_010548    | 1.00            | 1.11    | 1.00      | -8.66   |
| Bcl2l1 | Mm.238213 | NM_009743    | 1.00            | 1.00    | 1.00      | -4.01   | Il12a    | Mm.103783 | NM_008351    | 1.00            | 1.11    | 1.00      | -8.62   |
| Ccl2   | Mm.290320 | NM_011333    | 1.00            | -2.10   | 1.00      | -1.00   | Il12b    | Mm.239707 | NM_001303244 | 1.00            | -3.59   | 1.00      | -8.47   |
| Ccl20  | Mm.116739 | NM_016960    | 1.00            | 1.11    | 1.00      | -2.01   | Il13     | Mm.1284   | NM_008355    | 1.00            | 4.11    | 1.00      | -17.44  |
| Ccl22  | Mm.12895  | NM_009137    | 1.00            | 1.14    | 1.00      | -34.85  | Il15     | Mm.4392   | NM_008357    | 1.00            | 1.05    | 1.00      | -4.00   |
| Ccl28  | Mm.143745 | NM_020279    | 1.00            | 1.08    | 1.00      | -2.34   | Il17a    | Mm.5419   | NM_010552    | 1.00            | 1.10    | 1.00      | 4.16    |
| Ccl4   | Mm.244263 | NM_013652    | 1.00            | -3.58   | 1.00      | -1.94   | Il1a     | Mm.15534  | NM_010554    | 1.00            | -1.99   | 1.00      | -8.61   |
| Ccl5   | Mm.284248 | NM_013653    | 1.00            | 1.07    | 1.00      | -4.04   | Il1b     | Mm.222830 | NM_008361    | 1.00            | 1.10    | 1.00      | -2.03   |
| Ccr1   | Mm.274927 | NM_009912    | 1.00            | -1.00   | 1.00      | -1.00   | Il1r1    | Mm.896    | NM_008362    | 1.00            | 1.11    | 1.00      | -4.03   |
| Ccr10  | Mm.8021   | NM_007721    | 1.00            | 1.11    | 1.00      | -7.56   | Il2      | Mm.14190  | NM_008366    | 1.00            | 1.22    | 1.00      | -4.67   |
| Ccr2   | Mm.6272   | NM_009915    | 1.00            | 1.10    | 1.00      | -9.73   | Il22     | Mm.103585 | NM_016971    | 1.00            | 4.04    | 1.00      | -2.16   |
| Ccr4   | Mm.1337   | NM_009916    | 1.00            | 1.16    | 1.00      | -2.41   | Il23a    | Mm.125482 | NM_031252    | 1.00            | 1.07    | 1.00      | -4.99   |
| Ccr5   | Mm.14302  | NM_009917    | 1.00            | -1.90   | 1.00      | -1.75   | Il4      | Mm.276360 | NM_021283    | 1.00            | 1.15    | 1.00      | -9.07   |
| Ccr7   | Mm.2932   | NM_007719    | 1.00            | 4.17    | 1.00      | -2.45   | Il5      | Mm.4461   | NM_010558    | 1.00            | 4.14    | 1.00      | -2.20   |
| Ccr9   | Mm.440604 | NM_009913    | 1.00            | 1.11    | 1.00      | -7.84   | Il6      | Mm.1019   | NM_001314054 | 1.00            | 1.11    | 1.00      | -8.77   |
| Cd274  | Mm.245363 | NM_021893    | 1.00            | -3.79   | 1.00      | -2.01   | Irf1     | Mm.105218 | NM_008390    | 1.00            | 1.11    | 1.00      | 4.07    |
| Csf1   | Mm.795    | NM_007778    | 1.00            | 1.02    | 1.00      | 2.23    | Kitl     | Mm.45124  | NM_013598    | 1.00            | 1.12    | 1.00      | 1.95    |
| Csf2   | Mm.4922   | NM_009969    | 1.00            | -1.94   | 1.00      | -2.16   | Mif      | Mm.2326   | NM_010798    | 1.00            | -7.15   | 1.00      | 31.53   |
| Csf3   | Mm.1238   | NM_009971    | 1.00            | -1.11   | 1.00      | -4.33   | Myc      | Mm.2444   | NM_010849    | 1.00            | 1.12    | 1.00      | -8.10   |
| Ctla4  | Mm.390    | NM_009843    | 1.00            | -1.04   | 1.00      | -9.22   | Myd88    | Mm.213003 | NM_010851    | 1.00            | -3.33   | 1.00      | -2.21   |
| Cxcl1  | Mm.21013  | NM_008176    | 1.00            | 1.09    | 1.00      | -7.46   | Nfkb1    | Mm.256765 | NM_008689    | 1.00            | 1.11    | 1.00      | 1.07    |
| Cxcl10 | Mm.877    | NM_021274    | 1.00            | -4.08   | 1.00      | -4.00   | Nos2     | Mm.2893   | NM_001313921 | 1.00            | 1.07    | 1.00      | -2.07   |
| Cxcl11 | Mm.131723 | NM_019494    | 1.00            | -3.55   | 1.00      | -16.98  | Pdcd1    | Mm.5024   | NM_008798    | 1.00            | 1.14    | 1.00      | -4.05   |
| Cxcl12 | Mm.303231 | NM_021704    | 1.00            | 1.04    | 1.00      | 1.11    | Ptgs2    | Mm.292547 | NM_011198    | 1.00            | 1.03    | 1.00      | -1.02   |
| Cxcl2  | Mm.4979   | NM_009140    | 1.00            | -1.78   | 1.00      | 1.03    | Spp1     | Mm.288474 | NM_009263    | 1.00            | -1.79   | 1.00      | 64.77   |
| Cxcl5  | Mm.4660   | NM_009141    | 1.00            | -1.80   | 1.00      | -34.96  | Stat1    | Mm.277406 | NM_009283    | 1.00            | 1.11    | 1.00      | 1.05    |
| Cxcl9  | Mm.766    | NM_008599    | 1.00            | 4.05    | 1.00      | -2.03   | Stat3    | Mm.473190 | NM_011486    | 1.00            | 1.11    | 1.00      | 1.98    |
| Cxcr1  | Mm.337035 | NM_178241    | 1.00            | -1.02   | 1.00      | -8.55   | Tgfb1    | Mm.248380 | NM_011577    | 1.00            | 1.11    | 1.00      | 8.10    |
| Cxcr2  | Mm.234466 | NM_009909    | 1.00            | 1.11    | 1.00      | -8.46   | Tlr2     | Mm.87596  | NM_011905    | 1.00            | -1.04   | 1.00      | 1.06    |
| Cxcr3  | Mm.12876  | NM_009910    | 1.00            | 1.11    | 1.00      | -2.03   | Tlr3     | Mm.33874  | NM_126166    | 1.00            | 1.11    | 1.00      | -8.77   |
| Cxcr4  | Mm.1401   | NM_009911    | 1.00            | 4.15    | 1.00      | -8.68   | Tlr4     | Mm.38049  | NM_021297    | 1.00            | 1.06    | 1.00      | -2.36   |
| Cxcr5  | Mm.6246   | NM_007551    | 1.00            | 1.15    | 1.00      | -2.42   | Tlr7     | Mm.23979  | NM_133211    | 1.00            | 1.21    | 1.00      | -2.26   |
| Egf    | Mm.252481 | NM_010113    | 1.00            | 1.19    | 1.00      | -134.73 | Tlr9     | Mm.44889  | NM_031178    | 1.00            | 1.28    | 1.00      | -4.05   |
| Egfr   | Mm.439882 | NM_007912    | 1.00            | -3.53   | 1.00      | 1.00    | Tnf      | Mm.1293   | NM_013693    | 1.00            | 1.14    | 1.00      | -2.04   |
| Fasl   | Mm.3355   | NM_010177    | 1.00            | 1.11    | 1.00      | -17.21  | Tnfsf10  | Mm.1062   | NM_009425    | 1.00            | 1.16    | 1.00      | -9.39   |
| Foxp3  | Mm.182291 | NM_054039    | 1.00            | 1.11    | 1.00      | -8.41   | Trp53    | Mm.222    | NM_011640    | 1.00            | 1.16    | 1.00      | -1.03   |
| Gbp2b  | Mm.457978 | NM_010259    | 1.00            | 1.15    | 1.00      | -4.40   | Vegfa    | Mm.282184 | NM_009505    | 1.00            | 1.12    | 1.00      | 15.78   |
| Gzma   | Mm.15510  | NM_010370    | 1.00            | 1.25    | 1.00      | -9.28   | Actb     | Mm.328431 | NM_007393    | 1.00            | -3.58   | 1.00      | 63.90   |
| Gzmb   | Mm.14874  | NM_013542    | 1.00            | 4.10    | 1.00      | -8.70   | B2m      | Mm.163    | NM_009735    | 1.00            | -1.78   | 1.00      | -16.62  |
| H2-D1  | Mm.439675 | NM_010380    | 1.00            | -1.80   | 1.00      | 3.99    | Gapdh    | Mm.309092 | NM_008084    | 1.00            | 1.13    | 1.00      | -4.13   |
| H2-K1  | Mm.466882 | NM_001001892 | 1.00            | -1.88   | 1.00      | 1.99    | Gusb     | Mm.3317   | NM_010368    | 1.00            | 1.00    | 1.00      | 1.00    |
| Hif1a  | Mm.3879   | NM_001313919 | 1.00            | 1.18    | 1.00      | -2.10   | Hsp90ab1 | Mm.2180   | NM_008302    | 1.00            | 2.17    | 1.00      | 1.97    |
| Ido1   | Mm.392    | NM_008324    | 1.00            | 1.11    | 1.00      | -4.75   |          |           |              |                 |         |           |         |

# Supplemental Figure 1

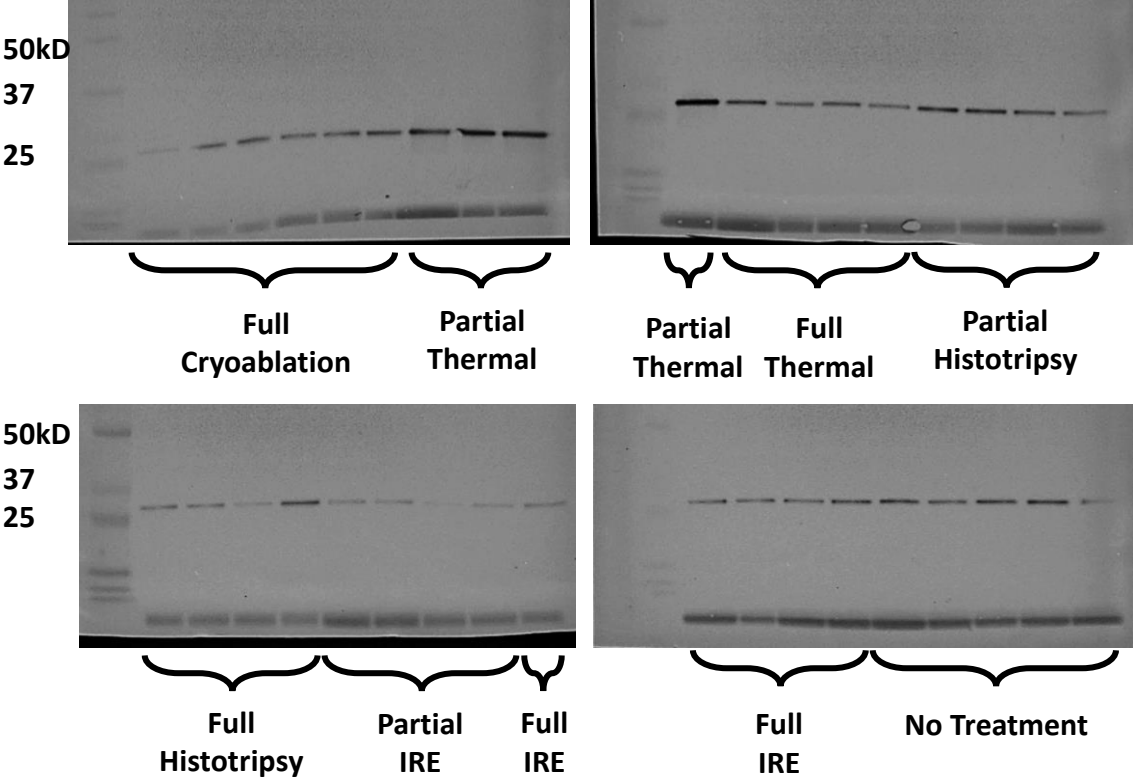

Supplement: NIHMS1821486-supplement-Supplementary_Material.pdf [file NIHMS1821486-supplement-Supplementary_Material.pdf]
